# Supplementary material
Source: Royal Society of Chemistry journal article supplement (doi:10.1039/d6ay00325g)
Supplement: d6ay00325g1.pdf [file d6ay00325g1.pdf]

## Supplementary material

### Reaction-Induced Fluorogenic Sensing of Benzodiazepines: A 3D-Printed Smartphone-Based Device with Multivariate RGB Optimization

Thiago Alvares Zamaro de Freitas<sup>a,b</sup>, Matheus Martins Guedes<sup>a</sup>, Camilla Fonseca Silva<sup>a,c</sup>, Marcella Matos Cordeiro Borges<sup>a,d</sup>, Álvaro Cunha Neto<sup>d</sup>, Josefredo Rodriguez Pliego Júnior<sup>a</sup>, Cleocir José Dalmaschio<sup>d</sup>, Keyller Bastos Borges<sup>a,\*</sup>

<sup>a</sup> Departamento de Ciências Naturais, Universidade Federal de São João del-Rei (UFSJ), Campus Dom Bosco, Praça Dom Helvécio 74, Fábricas, 36301-160, São João del-Rei, Minas Gerais, Brazil

<sup>b</sup> Instituto de Química, Universidade Estadual de Campinas (UNICAMP), P.O. Box 6154, 13083-970 Campinas, SP, Brazil

<sup>c</sup> Departamento de Química, Instituto de Ciências Exatas, Universidade Federal de Minas Gerais (UFMG), Av. Presidente Antônio Carlos, 6627, 31270-901, Belo Horizonte, MG, Brazil.

<sup>d</sup> Departamento de Química, Universidade Federal Espírito Santo (UFES), Av. Fernando Ferrari, 514, Goiabeiras, 29075-910, Vitória, Espírito Santo, Brazil

**\* Corresponding author:**

Prof. Keyller Bastos Borges, Ph.D., Departamento de Ciências Naturais, Universidade Federal de São João del-Rei, Campus Dom Bosco, Praça Dom Helvécio 74, Fábricas, 36301-160, São João del-Rei, Minas Gerais, Brazil.

e-mail: [keyller@ufsj.edu.br](mailto:keyller@ufsj.edu.br)

Tel.: +55 32 3379 – 5163

## Figures

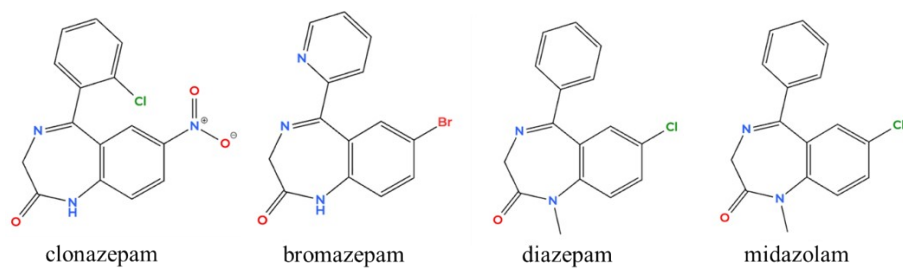

**Figure S1.** Chemical structures of clonazepam, bromazepam, diazepam, and midazolam.

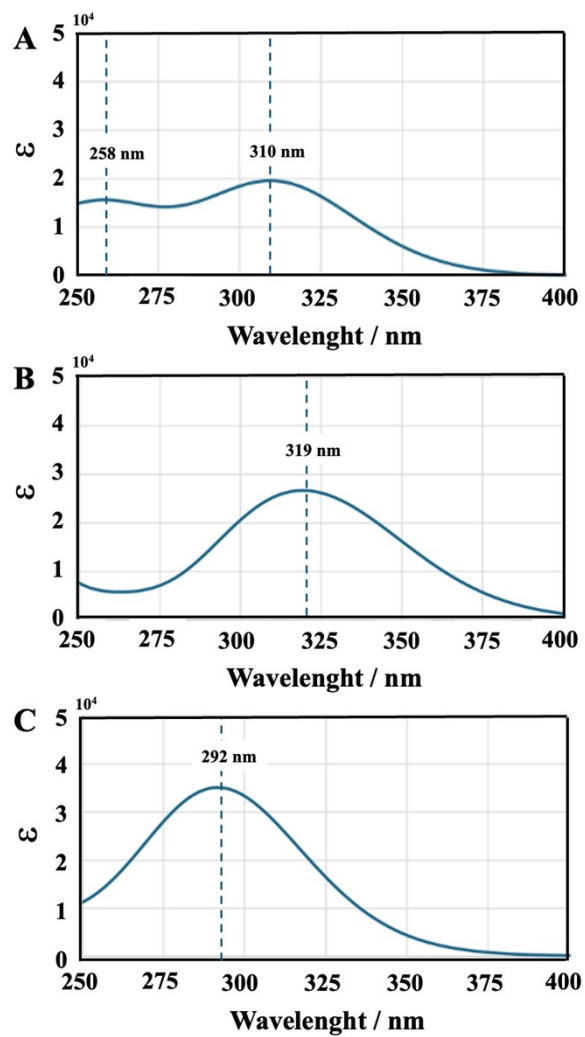

**Figure S2.** Theoretical TD-DFT/CPCM/PBE0/def2-SVP calculations of the UV/vis spectra of clonazepam and some key intermediates in ethanol solvent. (A) MS1; (B) MS4; and (C) MS5.

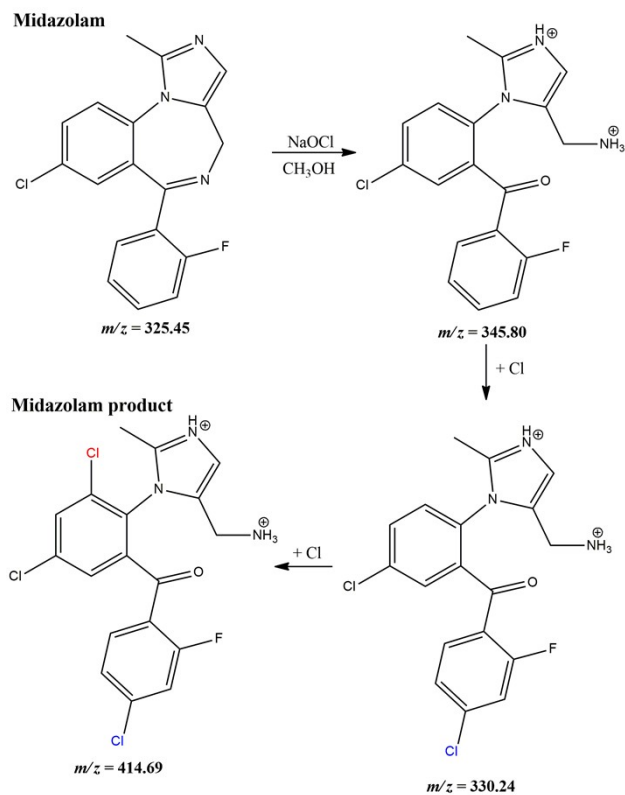

**Figure S3.** Proposed oxidative transformation of midazolam, including the open-ring benzophenone system and dichlorination.

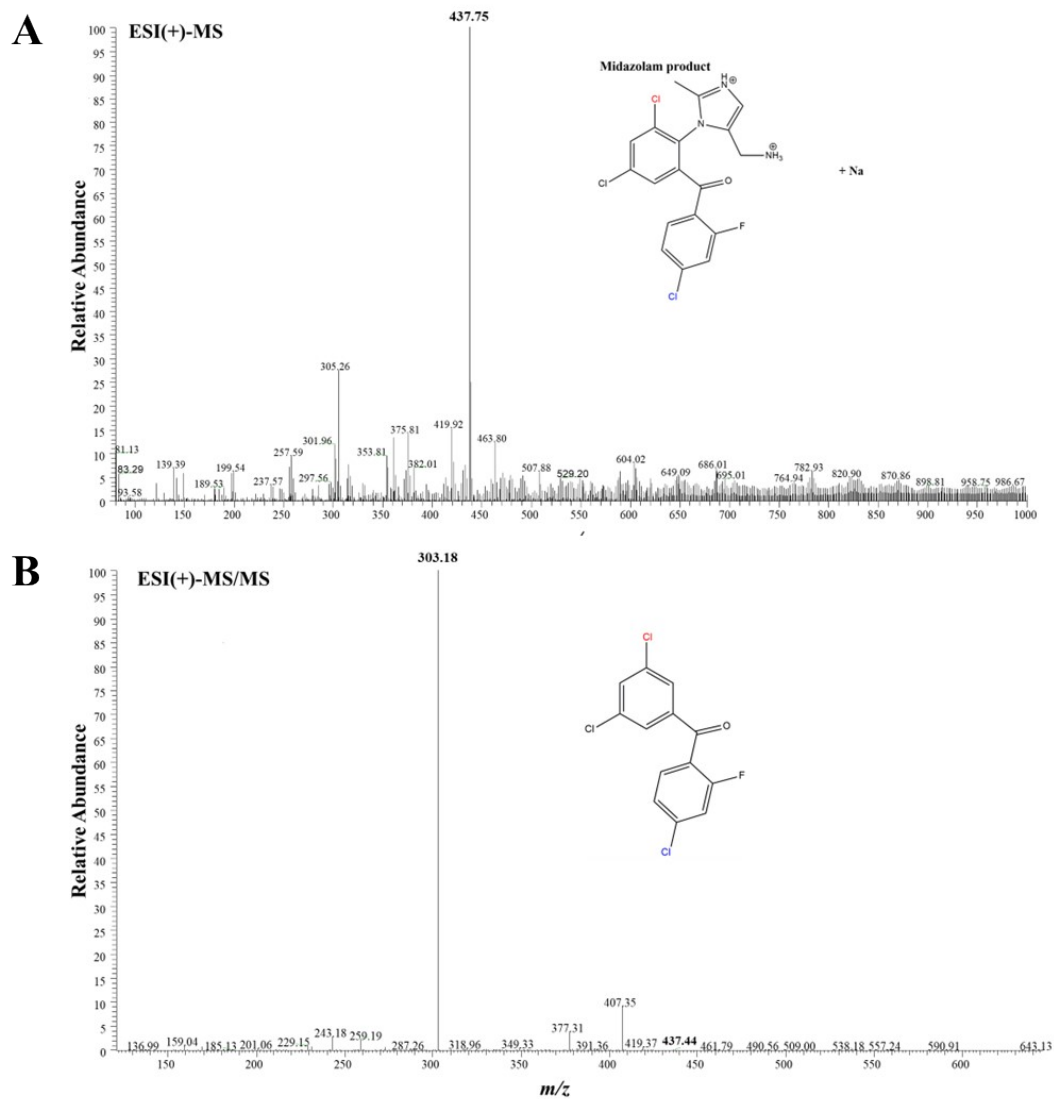

**Figure S4.** ESI(+)-MS and MS/MS for midazolam product obtained from reaction of midazolam with NaOCl.

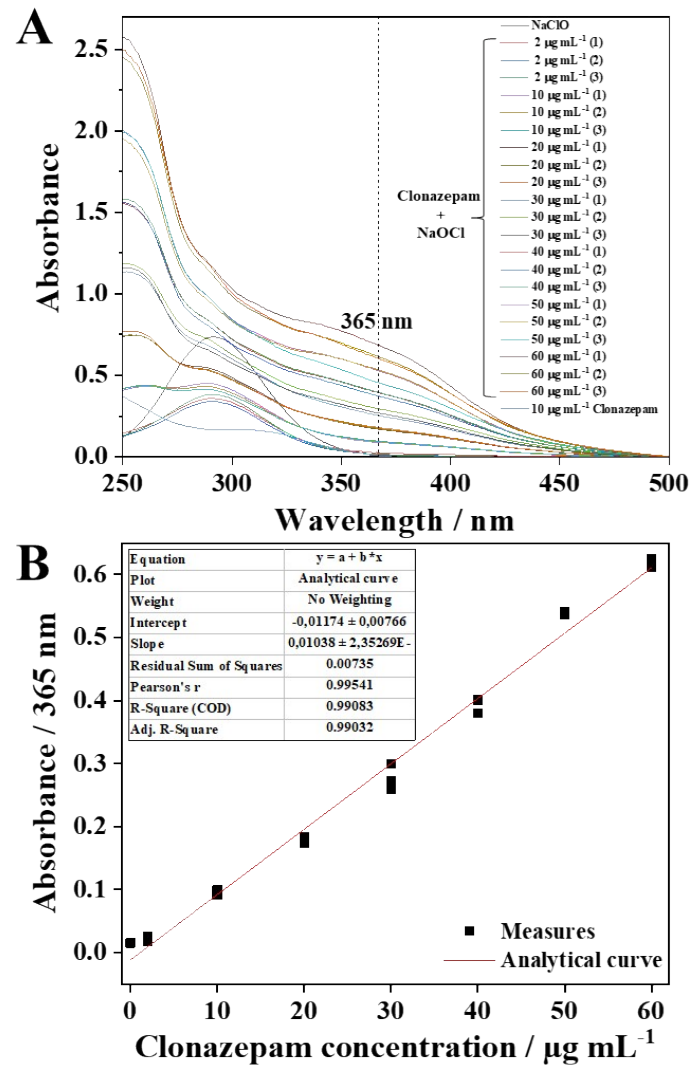

**Figure S5.** (A) UV-Vis spectra of clonazepam standards, of the NaOCl solution; (B) Analytical curves of the clonazepam samples at concentrations of 2, 10, 20, 30, 40, 50, and 60  $\mu\text{g mL}^{-1}$  after reaction with NaOCl.

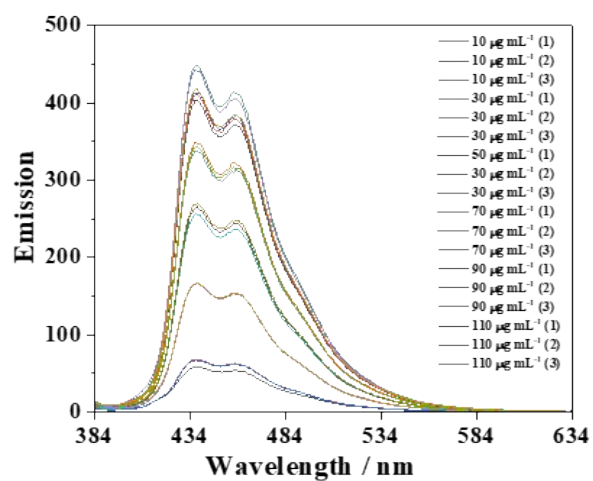

**Figure S6.** (A) UV-Vis spectra of the diazepam samples at concentrations of 10, 30, 50, 70, 90, and 110  $\mu\text{g mL}^{-1}$  after reaction with NaOCl.

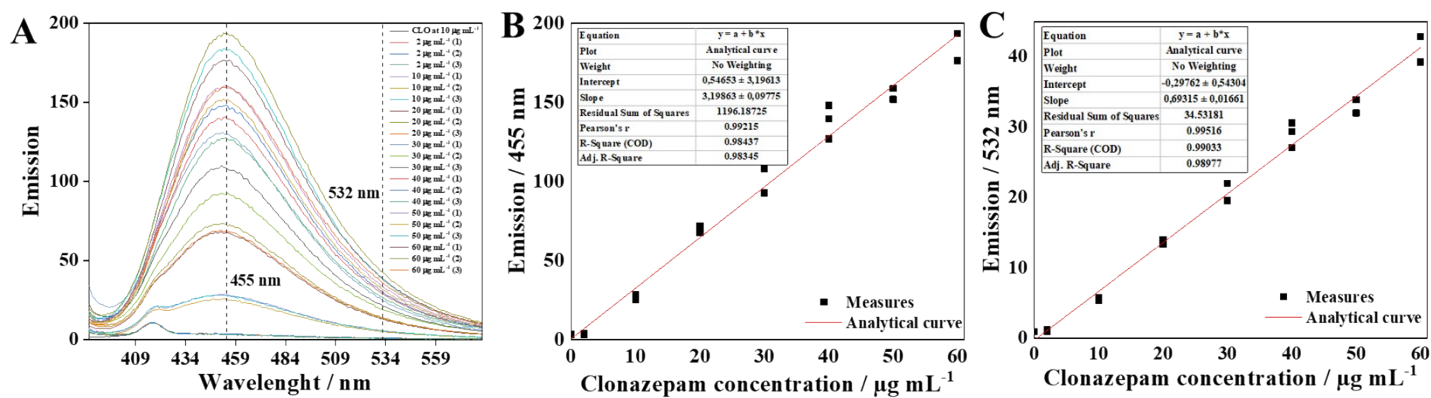

**Figure S7.** (A) Graphs of the emission intensities of the clonazepam samples after reaction with NaOCl, under excitation of 365 nm; Analytical curves of the samples of clonazepam at 0, 2, 10, 20, 30, 40, 50, and 60 mg mL<sup>-1</sup> after reaction with NaOCl, being (B) at 455 nm and (C) at 532 nm.
